# Supplementary material for: Prediction of Anthocyanidins Content in Purple Chinese Cabbage Based on Visible/Near Infrared Spectroscopy
Source: MDPI journal article supplement (doi:10.3390/foods12091922), 2023-05-08
Supplement: s1 [file s1]

Table S1. Contents of anthocyanidins in purple Chinese cabbage analyzed by high-performance liquid chromatography (mg/kg)

| No. | delphinidin | cyanindin | pelargonidin | peonidin | No. | delphinidin | cyanindin | pelargonidin | peonidin | No. | delphinidin | cyanindin | pelargonidin | peonidin |
|-----|-------------|-----------|--------------|----------|-----|-------------|-----------|--------------|----------|-----|-------------|-----------|--------------|----------|
| 1   | 173.9       | 3698.3    | 54.5         | 46.0     | 37  | 179.3       | 4035.7    | 55.1         | 47.0     | 73  | 155.6       | 10600.6   | 54.7         | 52.4     |
| 2   | 171.2       | 5005.9    | 52.9         | 47.8     | 38  | 162.7       | 4385.8    | 54.4         | 43.6     | 74  | 164.8       | 10149.0   | 57.0         | 54.5     |
| 3   | 159.8       | 4542.4    | 49.1         | 45.0     | 39  | 167.5       | 6240.8    | 55.8         | 45.9     | 75  | 169.7       | 9711.2    | 53.8         | 57.7     |
| 4   | 150.3       | 4524.0    | 48.7         | 41.1     | 40  | 171.8       | 5947.6    | 56.7         | 46.8     | 76  | 158.8       | 10101.2   | 52.3         | 49.4     |
| 5   | 163.4       | 5417.6    | 49.9         | 42.8     | 41  | 170.6       | 6450.3    | 55.5         | 48.1     | 77  | 170.2       | 12656.1   | 57.1         | 57.5     |
| 6   | 173.2       | 7634.0    | 59.8         | 46.7     | 42  | 193.7       | 7279.4    | 61.9         | 54.1     | 78  | 183.6       | 12579.2   | 64.0         | 56.7     |
| 7   | 164.9       | 5861.8    | 55.4         | 45.9     | 43  | 181.4       | 7056.3    | 60.2         | 52.8     | 79  | 181.3       | 12368.4   | 61.8         | 55.4     |
| 8   | 149.3       | 4638.2    | 50.1         | 40.7     | 44  | 181.1       | 7746.5    | 62.3         | 51.9     | 80  | 185.1       | 11785.7   | 58.6         | 57.5     |
| 9   | 134.6       | 5056.7    | 43.1         | 36.3     | 45  | 167.7       | 7721.1    | 56.6         | 48.2     | 81  | nd          | 373.7     | nd           | nd       |
| 10  | 151.8       | 847.0     | 46.2         | 35.9     | 46  | 168.5       | 6986.2    | 56.4         | 49.1     | 82  | nd          | 149.7     | nd           | nd       |
| 11  | 165.4       | 1498.3    | 51.0         | 39.8     | 47  | 172.1       | 7197.5    | 56.7         | 47.2     | 83  | nd          | 93.5      | nd           | nd       |
| 12  | 149.6       | 792.7     | 44.3         | 33.9     | 48  | 174.0       | 5756.0    | 59.2         | 48.8     | 84  | 187.4       | 5103.6    | 60.4         | 52.0     |
| 13  | 165.2       | 1788.9    | 49.2         | 40.0     | 49  | 150.7       | 3437.1    | 47.2         | 42.6     | 85  | 182.9       | 8246.2    | 65.2         | 54.5     |
| 14  | 146.7       | 2247.5    | 46.2         | 36.1     | 50  | 164.2       | 4211.3    | 52.6         | 46.1     | 86  | 166.9       | 6705.6    | 59.4         | 48.6     |
| 15  | 140.9       | 1430.3    | 43.6         | 34.2     | 51  | 189.7       | 3737.0    | 60.2         | 52.1     | 87  | 150.7       | 819.8     | 45.2         | 34.9     |
| 16  | 177.4       | 2334.5    | 55.4         | 44.5     | 52  | 154.0       | 2375.9    | 47.7         | 40.3     | 88  | 175.7       | 5610.4    | 56.9         | 50.1     |
| 17  | 166.9       | 3305.5    | 52.6         | 42.5     | 53  | 158.0       | 3517.8    | 47.8         | 42.5     | 89  | nd          | 419.9     | nd           | nd       |
| 18  | 172.2       | 2733.0    | 54.3         | 44.5     | 54  | 168.1       | 3391.4    | 52.7         | 46.4     | 90  | 158.5       | 5672.9    | 51.8         | 51.8     |
| 19  | 189.5       | 5460.9    | 62.4         | 54.4     | 55  | 169.1       | 2667.0    | 52.9         | 43.9     | 91  | 145.8       | 4482.9    | 47.7         | 47.1     |
| 20  | 164.7       | 3882.3    | 52.4         | 46.4     | 56  | 141.2       | 3494.8    | 44.7         | 39.2     | 92  | 153.9       | 3928.3    | 44.5         | 35.8     |
| 21  | 152.1       | 4930.9    | 50.1         | 45.7     | 57  | 137.6       | 2859.6    | 44.4         | 38.3     | 93  | 159.7       | 4824.4    | 59.1         | 49.0     |
| 22  | 165.7       | 6118.2    | 54.7         | 48.8     | 58  | 147.2       | 3787.7    | 45.7         | 40.3     | 94  | 150.6       | 4626.4    | 58.7         | 41.6     |
| 23  | 183.5       | 5333.7    | 58.9         | 49.6     | 59  | 147.9       | 7160.7    | 52.6         | 48.0     | 95  | 173.6       | 7833.9    | 53.7         | 47.7     |
| 24  | 187.3       | 7174.0    | 66.0         | 53.4     | 60  | 163.0       | 10658.0   | 58.2         | 55.9     | 96  | 150.9       | 1132.3    | 53.5         | 34.1     |
| 25  | 165.2       | 6582.6    | 54.6         | 49.1     | 61  | 157.7       | 5100.1    | 52.3         | 46.2     | 97  | 177.5       | 2234.2    | 57.4         | 45.6     |
| 26  | 156.5       | 4343.1    | 51.0         | 44.6     | 62  | 158.9       | 7828.1    | 55.9         | 49.6     | 98  | 157.2       | 2831.8    | 54.2         | 44.2     |
| 27  | 166.1       | 5067.9    | 52.7         | 45.8     | 63  | 156.6       | 9245.0    | 57.1         | 52.3     | 99  | 149.8       | 3961.5    | 46.5         | 42.3     |

|           |       |        |      |      |           |       |         |      |      |            |       |        |      |      |
|-----------|-------|--------|------|------|-----------|-------|---------|------|------|------------|-------|--------|------|------|
| <b>28</b> | 185.8 | 5102.5 | 59.1 | 51.4 | <b>64</b> | 161.0 | 4813.1  | 54.9 | 44.3 | <b>100</b> | 171.1 | 7865.3 | 63.3 | 55.6 |
| <b>29</b> | 178.5 | 6412.4 | 58.0 | 51.3 | <b>65</b> | 171.2 | 6068.5  | 55.5 | 49.8 | <b>101</b> | 148.5 | 7081.9 | 56.8 | 59.1 |
| <b>30</b> | 188.8 | 9625.5 | 63.6 | 57.5 | <b>66</b> | 175.6 | 12802.4 | 62.0 | 63.0 | <b>102</b> | 192.7 | 3796.2 | 63.2 | 57.1 |
| <b>31</b> | 154.5 | 4460.9 | 48.8 | 41.0 | <b>67</b> | 149.1 | 8369.6  | 51.1 | 51.2 | <b>103</b> | 159.1 | 1767.3 | 42.9 | 50.9 |
| <b>32</b> | 170.9 | 7017.2 | 59.7 | 46.0 | <b>68</b> | 169.1 | 6745.0  | 58.7 | 50.7 | <b>104</b> | 169.5 | 8336.6 | 51.3 | 61.2 |
| <b>33</b> | 149.6 | 4031.2 | 46.6 | 42.4 | <b>69</b> | 157.8 | 9136.8  | 55.8 | 47.3 | <b>105</b> | 159.6 | 316.7  | 58.3 | 54.7 |
| <b>34</b> | 143.8 | 4454.9 | 46.3 | 40.6 | <b>70</b> | 141.8 | 7897.9  | 49.8 | 46.1 | <b>106</b> | 169.9 | 6805.0 | 49.5 | 38.6 |
| <b>35</b> | 178.1 | 6792.7 | 61.8 | 49.7 | <b>71</b> | 152.1 | 6231.8  | 49.8 | 45.7 |            |       |        |      |      |
| <b>36</b> | 169.1 | 5454.1 | 55.0 | 44.9 | <b>72</b> | 144.4 | 5178.2  | 49.7 | 41.9 |            |       |        |      |      |

---

No. 1-86: the calibration set samples; No. 87-106: the validation set samples.

nd: not detected.
